# Supplementary material for: Assessing the average causal effect of maternal postpartum depression diagnosis on subsequent child development at age five years: A causal analysis using the All Our Families cohort and administrative data in Alberta, Canada
Source: Research Square preprint supplement (doi:10.21203/rs.3.rs-6786612/v1), 2025-06-12
Supplement: Supplementary file 1 [file 9d46d787c93b7b8b488f0efe.docx]

**Assessing the average causal effect of maternal postpartum depression diagnosis on subsequent child development at age five years: A causal analysis using the All Our Families cohort and administrative data in Alberta, Canada**

**Authors:**

Shainur Premji,Centre for Health Economics, University of York, York, United Kingdom.

Nicole Racine,School of Psychology, University of Ottawa and Children’s Hospital of Eastern Ontario Research Institute, Ottawa, Ontario, Canada.

Deborah McNeil, Faculty of Nursing, University of Calgary and Department of Community Health Sciences, Cumming School of Medicine, University of Calgary, Calgary, Alberta, Canada.

Eldon Spackman, Department of Community Health Sciences, Cumming School of Medicine, University of Calgary, Calgary, Alberta, Canada.

**Corresponding Author:**

Dr Shainur Premji, Centre for Health Economics, University of York, Heslington, York, YO10 5DD, United Kingdom, [shainur.premji@york.ac.uk](mailto:shainur.premji@york.ac.uk), +44 (0)1904 321467

**Journal:**

Social Psychiatry and Psychiatric Epidemiology

**Supplementary Appendix**

**A1. Administrative case definition used to identify PPD, developed in partnership with frontline practitioners and content experts**

**
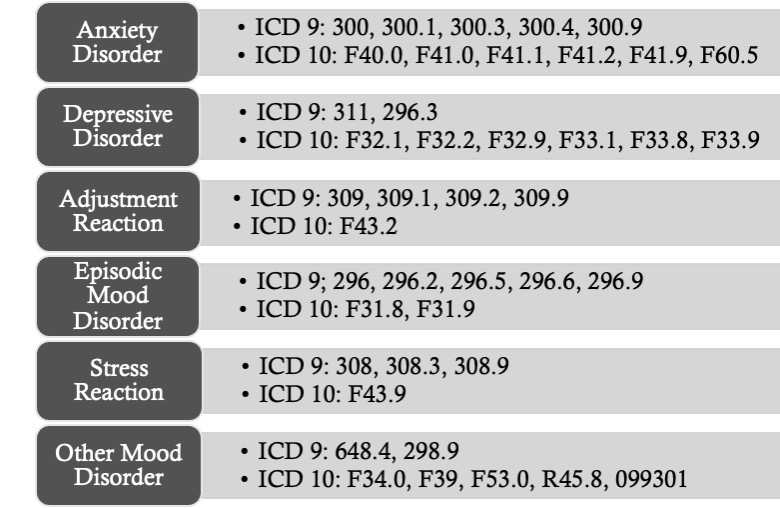
**

**A2. Operational definition of study variables**

| **Variable** | **Source** | **Operational definition** |
| --- | --- | --- |
| **During pregnancy (AOF Questionnaire, <25 weeks’ gestation)** | | |
| Education | AOF | What is the highest level of education you have completed? Recoded to greater than high school (> high school), high school or less (≤ high school) |
| Ethnicity | AOF | How would you describe your ethnic background? Recoded to White, Other |
| Household income | AOF | What is your total income, before taxes and deductions, for all household members from all sources in the past 12 months? (reported in increments of $10,000, from less than $10,000 to $150,000 or more). Cutoff $80,000 applied to study. |
| Marital status | AOF | How would you describe your current marital status? Married, common-law; single, divorced, separated, widowed (Other) |
| Social support in pregnancy | AOF | Medical Outcomes Study Social Support Scale (MOS SSS) completed by mother, cutoff score 70 applied to indicate *adequate* or *inadequate* social support |
| Time in Canada | AOF | Were you born in Canada? (yes or no); If no, what is the total number of months you have been in Canada? Recoded to born in Canada/ lived here for greater than 5 years (≥5 years); lived in Canada less than 5 years (<5 years) |
| **After birth (AOF Questionnaire, 4 months postpartum)** | | |
| History of mental health | AOF | Ever experienced feeling sad, blue, depressed or down for most of the time for at least two weeks, or ever experienced other mental disorders such as generalised anxiety disorder, bipolar disorder, schizophrenia, or obsessive-compulsive disorder (yes or no) |
| Maternal age | AOF | Maternal age at delivery, continuous |
| Parity | AOF | No previous births (nulliparous); previous birth to a foetus, at least once (multiparous) |
| **AHS administrative data** | | |
| Birthweight | Vital statistics | Child’s birth weight is less than 2500g (≤2500g, low birthweight) or not (≥2500g) |
| Child gender | Vital statistics | Child’s gender (male or female) |
| Gestational age | Vital statistics | Full term (≥37 weeks), Less than full term (<37 weeks) |
| Large for gestational age | Vital statistics | Indicates whether the birth is large for gestational age (≥90th percentile: yes, or ≤90th percentile: no) |
| Admission to NICU | Inpatient, physician claims | Admission to NICU within 7 days of birth (yes or no) |
| LOS in NICU | Inpatient | Date of discharge minus date of admission for NICU inpatient stay |
| PPD risk score | Public health | Edinburgh Postnatal Depression Scale (EPDS) score, scores ranged from 0 to 30, with higher scores indicating greater risk for PPD |
| Small for gestational age | Vital statistics | Indicates whether the birth is small for gestational age (<10th percentile: yes, or ≥10th percentile: no). |

**A3. Sample size calculations**

To detect whether we had sufficient sample sizes to detect a meaningful clinically significant difference in child ASQ scores at age five years, we calculated the following estimated sample sizes.

ASQ scores range from 0 to 60, where the higher the score, the greater the functioning. Values that fall below one standard deviation from the mean indicate children may be at risk of delay.1 For the following ASQ domains, the anticipated effect size = % difference between the mean sample score for the domain and the 1SD cutoff score.

With a desired statistical power of 80%, probability level of 5%, and with 17 predictors in our regression model, we required between 91 and 155 participants in each group to detect a meaningful clinically significant difference in child ASQ scores at age five years.

Our analysis was therefore sufficiently powered to detect a clinically meaningful significant difference, with observed sample sizes ≥ 1696 per ASQ domain.

| **ASQ Domain** | **1SD cutoff** | **Mean sample score** | **Diff** | **% Diff** | **N required** |
| --- | --- | --- | --- | --- | --- |
| Communication | 42.80 | 53.73 | 10.93 | 18% | 124 |
| Gross Motor | 41.72 | 53.80 | 12.08 | 20% | 113 |
| Fine Motor | 39.05 | 51.36 | 12.31 | 21% | 109 |
| Problem Solving | 41.29 | 56.86 | 15.57 | 26% | 91 |
| Personal Social | 46.96 | 55.35 | 8.39 | 14% | 155 |

**A4. Propensity and outcome regression models**

Propensity model (logistic regression):

- Outcome variable: PPD diagnosis
- Model covariates: PPD risk, ethnicity, time in Canada, history of mental health issues, social support during pregnancy, gestational age, admission to NICU within seven days of birth, birthweight

Outcome model (linear regression):

- Outcome variable: ASQ score
- Model covariates: PPD diagnosis, PPD risk, total annual household income, parity, child sex, maternal age at delivery, marital status, maternal education, ethnicity, gestational age, time in Canada, history of mental health issues, length of stay in NICU, birthweight, gestational age, social support during pregnancy

**A5. Multiple Imputation**

PPD risk score (14.5% missing data)

*Assessing the mechanism of missingness:*

|  | **p-value** |
| --- | --- |
| **Marital status** |  |
| Married/Common Law | 0.136 |
| Other |
| **Education** |  |
| >High School | 0.126 |
| ≤High School |
| **Ethnicity** |  |
| White | 0.264 |
| Other |
| **Time in Canada** |  |
| ≥5 years | 0.276 |
| <5 years |
| **Annual household income** |  |
| ≥$80,000 | **0.001** |
| <$80,000 |
| **Parity** |  |
| Nulliparous | **<0.001** |
| Multiparous |
| **History of mental health issues** | |
| No | **<0.001** |
| Yes |
| **Social support in pregnancy** |  |
| Adequate | 0.307 |
| Inadequate |
| **Gestational age** |  |
| ≥37 weeks | 0.476 |
| <37 weeks |
| **Child gender** |  |
| Male | **0.045** |
| Female |
| **NICU admission within 7 days of birth** | |
| No | 0.694 |
| Yes |
| **Birthweight** |  |
| ≥2500 g | **<0.001** |
| <2500 g |
| **Small for gestational age** |  |
| No | 0.144 |
| Yes |
| **Large for gestational age** |  |
| No | 0.360 |
| Yes |

Given missingness in PPD risk score was associated with being multiparous, having a total annual household income of less than $80,000, having a positive history of mental health issues, giving birth to a male child, and giving birth to a child with low birthweight (less than 2500g), we assumed data are missing at random and proceeded to use multiple imputation (MI) methods to estimate the missing values.

*MI Approach:* Predictive mean matching.

*Rationale*: Uses realistic estimates that are based on data and does not go outside of observed scores.2

*Final MI model covariates*: PPD diagnosis, total annual household income, parity, ethnicity, time in Canada, history of mental health issues, length of stay in NICU, social support in pregnancy.

M=20 imputations, to achieve between 99-100% relative efficiency.3

*Evaluation of MI process.*

Distribution of observed data:

Distribution of observed & imputed data:

Sample characteristics using observed or observed & imputed data

| **Observed data** | | | | |
| --- | --- | --- | --- | --- |
| **N** | **Mean** | **SD** | **Min** | **Max** |
| 2,409 | 4.24 | 3.46 | 0 | 23 |
| **Observed and imputed data** | | | | |
| **N** | **Mean** | **SD** | **Min** | **Max** |
| 2,765 | 4.29 | 3.28 | 0 | 23 |

Child development scores (39.4% missing data on average per ASQ domain)

*Assessing the mechanism of missingness:*

|  | **p-value** |
| --- | --- |
| **Marital status** |  |
| Married/Common Law | **<0.001** |
| Other |
| **Education** |  |
| >High School | **<0.001** |
| ≤High School |
| **Ethnicity** |  |
| White | **<0.001** |
| Other |
| **Time in Canada** |  |
| ≥5 years | **0.002** |
| <5 years |
| **Annual household income** | |
| ≥$80,000 | **<0.001** |
| <$80,000 |
| **Parity** |  |
| Nulliparous | **0.006** |
| Multiparous |
| **History of mental health issues** | |
| No | 0.23 |
| Yes |
| **Social support in pregnancy** | |
| Adequate | **0.006** |
| Inadequate |
| **Gestational age** |  |
| ≥37 weeks | 0.129 |
| <37 weeks |
| **Child gender** |  |
| Male | 0.868 |
| Female |
| **NICU admission within 7 days of birth** | |
| No | 0.222 |
| Yes |
| **Birthweight** |  |
| ≥2500 g | 0.409 |
| <2500 g |
| **Small for gestational age** | |
| No | 0.870 |
| Yes |
| **Large for gestational age** | |
| No | 0.208 |
| Yes |

Given missingness in child development scores were associated with lower maternal education levels, not being partnered, being of other ethnicity, having been in Canada for less than five years, a total annual household income of less than $80,000, being multiparous, and having inadequate social support in pregnancy, we assumed data are missing at random and proceeded to use multiple imputation (MI) methods to estimate the missing values.

*MI Approach:* multiple imputation chained equations (MICE).

*Rationale*: enables the estimation of missing values using pre-specified multivariate models with conditional distributions.4

*Final MI model covariates*: PPD diagnosis, PPD risk, maternal age at delivery, marital status, total annual household income, parity, ethnicity, time in Canada, maternal education, history of mental health issues, child sex, gestational age, birthweight, length of stay in NICU, social support in pregnancy, small for gestational age, large for gestational age.

M=20 imputations, to achieve between 98-99% relative efficiency.3

*Evaluation of MI process.*

Distribution of observed data:


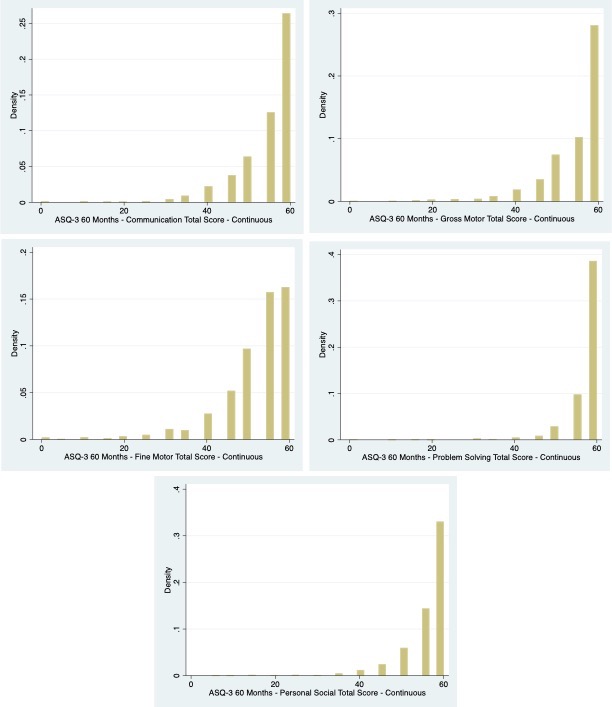


Distribution of observed & imputed data:


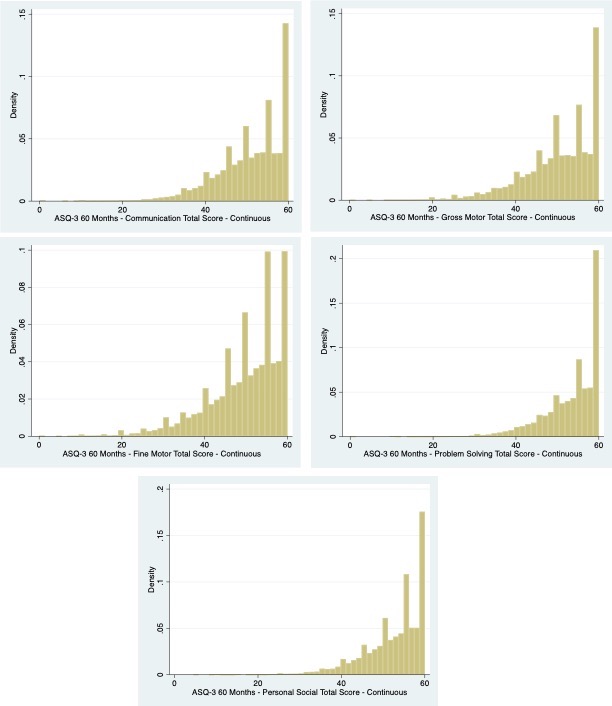


Sample characteristics using observed or observed & imputed data

|  | | Observed data | | | | |
| --- | --- | --- | --- | --- | --- | --- |
|  | **ASQ Domain** | **N** | **Mean** | **SD** | **Min** | **Max** |
|  | Communication | 1,696 | 54.54 | 7.95 | 0 | 60 |
|  | Gross Motor | 1,704 | 54.64 | 8.03 | 0 | 60 |
|  | Fine Motor | 1,700 | 51.86 | 9.47 | 0 | 60 |
|  | Problem Solving | 1,709 | 57.68 | 5.42 | 0 | 60 |
|  | Personal Social | 1,717 | 56.05 | 6.43 | 5 | 60 |
|  |  | Observed and imputed data | | | | |
|  | **ASQ Domain** | **N** | **Mean** | **SD** | **Min** | **Max** |
|  | Communication | 2,615 | 53.73 | 6.63 | 0 | 60 |
|  | Gross Motor | 2,618 | 53.80 | 6.70 | 0 | 60 |
|  | Fine Motor | 2,619 | 51.36 | 7.79 | 0 | 60 |
|  | Problem Solving | 2,618 | 56.86 | 4.60 | 0 | 60 |
|  | Personal Social | 2,618 | 55.35 | 5.44 | 5 | 60 |

**A6. Results of categorical analysis**

Association between maternal PPD diagnosis and child risk of delay at age 5 years.

**Complete Case Analysis**

| **ASQ Domain** | **No PPD Diagnosis (n=2473)** | **PPD Diagnosis (n=343)** | **p-value** |
| --- | --- | --- | --- |
| **Communication: N (%)** | | | |
| No risk of delay | 1396 (92.2) | 167 (91.8) | 0.832 |
| Risk of delay | 118 (7.8) | 15 (9.2) |  |
| **Gross Motor: N (%)** | | | |
| No risk of delay | 1412 (92.8) | 163 (89.1) | 0.069 |
| Risk of delay | 109 (7.2) | 20 (10.9) |  |
| **Fine Motor: N (%)** | | | |
| No risk of delay | 1419 (93.5) | 165 (90.2) | 0.087 |
| Risk of delay | 98 (6.5) | 18 (9.8) |  |
| **Problem Solving: N (%)** | | | |
| No risk of delay | 1495 (98.0) | 178 (96.7) | 0.248 |
| Risk of delay | 30 (2.0) | 6 (3.3) |  |
| **Personal Social: N (%)** | | | |
| No risk of delay | 1410 (92.0) | 166 (90.2) | 0.412 |
| Risk of delay | 123 (8.0) | 18 (9.8) |  |

**Imputed Analysis**

| **ASQ Domain** | **No PPD Diagnosis (n=2473)** | **PPD Diagnosis (n=343)** | **p-value** |
| --- | --- | --- | --- |
| **Communication: N (%)** | | | |
| No risk of delay | 2190 (94.8) | 288 (94.7) | 0.984 |
| Risk of delay | 121 (5.2) | 16 (5.3) |  |
| **Gross Motor: N (%)** | | | |
| No risk of delay | 2202 (95.2) | 285 (93.1) | 0.112 |
| Risk of delay | 110 (4.8) | 21 (6.9) |  |
| **Fine Motor: N (%)** | | | |
| No risk of delay | 2215 (95.8) | 287 (93.8) | 0.117 |
| Risk of delay | 98 (4.2) | 19 (6.2) |  |
| **Problem Solving: N (%)** | | | |
| No risk of delay | 2282 (98.7) | 300 (98.0) | 0.349 |
| Risk of delay | 30 (1.3) | 6 (2.0) |  |
| **Personal Social: N (%)** | | | |
| No risk of delay | 2184 (94.5) | 286 (93.5) | 0.477 |
| Risk of delay | 128 (5.5) | 20 (6.5) |  |

**References**

1. Kids in the monitoring zone: what to do next. Ages & Stages Questionnaires. 2019. https://agesandstages.com/free-resources/articles/kids-in-the-monitoring-zone/

2. Morris TP, White IR, Royston P. Tuning multiple imputation by predictive mean matching and local residual draws. *BMC Med Res Methodol*. 2014;14(1):75. doi:10.1186/1471-2288-14-75

3. Newgard CD, Haukoos JS. Advanced Statistics: Missing Data in Clinical Research-Part 2: Multiple Imputation. *Acad Emerg Med*. 2007;14(7):669-678. doi:10.1197/j.aem.2006.11.038

4. Austin PC, Van Buuren S. Logistic regression vs. predictive mean matching for imputing binary covariates. *Stat Methods Med Res*. 2023;32(11):2172-2183. doi:10.1177/09622802231198795
